# Supplementary material for: Lymphocyte-to-Monocyte Ratio and Clinical Outcomes in Cholangiocarcinoma: A Systematic Review and Meta-Analysis
Source: MDPI journal article supplement (doi:10.3390/diagnostics12112655), 2022-11-01

# **Lymphocyte-to-monocyte ratio and clinical outcomes in Cholangiocarcinoma: A systematic review and meta-analysis**

## **SUPPLEMENTARY MATERIAL**

### **S1 : Search Strategy**

#### **PUBMED**

##### **Lymphocyte (#1)**

Lymphocytes [MH] OR Lymphocyte [MH] OR Lymphoid Cells [MH] OR Cell, Lymphoid [MH] OR Cells, Lymphoid [MH] OR Lymphoid Cell [MH] OR Lymphocytes [TIAB] OR Lymphocyte [TIAB] OR “Lymphoid Cells” [TIAB] OR “Lymphoid Cell” [TIAB] OR Lymphocytes [OT] OR Lymphocyte [OT] OR “Lymphoid Cells” [OT] OR “Lymphoid Cell” [OT]

##### **Monocyte (#2)**

Monocyte [MH] OR Monocytes [MH] OR Monocyte [OT] OR Monocytes [OT] OR Monocyte [TIAB] OR Monocytes [TIAB]

##### **Lymphocyte to monocyte ratio (#3)**

“Lymphocyte/Monocyte ratio” [OT] OR “Lymphocyte/Monocyte index” [OT] OR “Ratio Lymphocyte/Monocyte” [OT] OR “Index Lymphocyte/Monocyte” [OT] OR “Lymphocyte to Monocyte ratio” [OT] OR “Lymphocyte-to Monocyte ratio” [OT] OR “Lymphocyte to-Monocyte ratio” [OT] OR “Lymphocyte-to-Monocyte ratio” [OT] OR “Lymphocyte to Monocyte index” [OT] OR “Lymphocyte-to Monocyte index” [OT] OR “Lymphocyte to-Monocyte index” [OT] OR “Lymphocyte-to-Monocyte index” [OT] OR “Ratio Lymphocyte to Monocyte” [OT] OR “Ratio Lymphocyte-to Monocyte” [OT] OR “Ratio Lymphocyte to-Monocyte” [OT] OR “Ratio Lymphocyte-to-Monocyte” [OT] OR

“Index Lymphocyte to Monocyte” [OT] OR “Index Lymphocyte-to Monocyte” [OT] OR  
“Index Lymphocyte to-Monocyte” [OT] OR “Index Lymphocyte-to-Monocyte” [OT] OR  
“Lymphocyte-monocyte ratio” [OT] OR “Lymphocyte-monocyte index” [OT] OR “Ratio  
Lymphocyte-monocyte” [OT] OR “Index Lymphocyte-monocyte” [OT] OR LMR [OT]

#### **Cholangiocarcinoma (#4)**

Cholangiocarcinoma [MH] OR Cholangiocarcinomas [MH] OR Cholangiocellular  
Carcinoma [MH] OR Carcinoma, Cholangiocellular [MH] OR Carcinomas,  
Cholangiocellular [MH] OR Cholangiocellular Carcinomas [MH] OR Extrahepatic  
Cholangiocarcinoma [MH] OR Cholangiocarcinoma, Extrahepatic [MH] OR  
Cholangiocarcinomas, Extrahepatic [MH] OR Extrahepatic Cholangiocarcinomas [MH]  
OR Intrahepatic Cholangiocarcinoma [MH] OR Cholangiocarcinoma, Intrahepatic [MH]  
OR Cholangiocarcinomas, Intrahepatic [MH] OR Intrahepatic Cholangiocarcinomas  
[MH] OR Cholangiocarcinoma [TIAB] OR Cholangiocarcinomas [TIAB] OR  
Cholangiocellular Carcinoma [TIAB] OR “Cholangiocellular Carcinomas” [TIAB] OR  
“Extrahepatic Cholangiocarcinoma” [TIAB] OR “Extrahepatic Cholangiocarcinomas”  
[TIAB] OR “Intrahepatic Cholangiocarcinoma” [TIAB] OR “Intrahepatic  
Cholangiocarcinomas” [TIAB] OR Cholangiocarcinoma [OT] OR Cholangiocarcinomas  
[OT] OR Cholangiocellular Carcinoma [OT] OR “Cholangiocellular Carcinomas” [OT]  
OR “Extrahepatic Cholangiocarcinoma” [OT] OR “Extrahepatic Cholangiocarcinomas”  
[OT] OR “Intrahepatic Cholangiocarcinoma” [OT] OR “Intrahepatic  
Cholangiocarcinomas” [OT]

#### **Search Formula :**

((#1 AND #2) OR #3) AND #4

## **SCOPUS**

(( ( TITLE-ABS-KEY ( "Lymphocytes" OR "Lymphocyte" OR "Lymphoid Cells" OR "Cell, Lymphoid" OR "Cells, Lymphoid" OR "Lymphoid Cell" OR "Lymphocytes" OR "Lymphocyte" OR "Lymphoid Cells" OR "Lymphoid Cell" OR "Lymphocytes" OR "Lymphocyte" OR "Lymphoid Cells" OR "Lymphoid Cell" ) ) AND ( TITLE-ABS-KEY ( "Monocyte" OR "Monocytes" OR "Monocyte" OR "Monocytes" OR "Monocyte" OR "Monocytes" ) ) ) OR ( ALL ( "Lymphocyte/Monocyte ratio" OR "Lymphocyte/Monocyte index" OR "Ratio Lymphocyte/Monocyte" OR "Index Lymphocyte/Monocyte" OR "Lymphocyte to Monocyte ratio" OR "Lymphocyte-to-Monocyte ratio" OR "Lymphocyte to Monocyte index" OR "Lymphocyte-to Monocyte index" OR "Lymphocyte to-Monocyte index" OR "Lymphocyte-to-Monocyte index" OR "Ratio Lymphocyte to Monocyte" OR "Ratio Lymphocyte-to Monocyte" OR "Ratio Lymphocyte to-Monocyte" OR "Ratio Lymphocyte-to-Monocyte" OR "Index Lymphocyte to Monocyte" OR "Index Lymphocyte-to Monocyte" OR "Index Lymphocyte to-Monocyte" OR "Index Lymphocyte-to-Monocyte" OR "Lymphocyte-monocyte ratio" OR "Lymphocyte-monocyte index" OR "Ratio Lymphocyte-monocyte" OR "Index Lymphocyte-monocyte" OR "LMR" ) ) ) AND ( TITLE-ABS-KEY ( "Cholangiocarcinoma" OR "Cholangiocarcinomas" OR "Cholangiocellular Carcinoma" OR "Carcinoma, Cholangiocellular" OR "Carcinomas, Cholangiocellular" OR "Cholangiocellular Carcinomas" OR "Extrahepatic Cholangiocarcinoma" OR "Cholangiocarcinoma, Extrahepatic" OR "Cholangiocarcinomas, Extrahepatic" OR "Extrahepatic Cholangiocarcinomas" OR "Intrahepatic Cholangiocarcinoma" OR "Cholangiocarcinoma, Intrahepatic" OR "Cholangiocarcinomas, Intrahepatic" OR

"Intrahepatic Cholangiocarcinomas" OR "Cholangiocarcinoma" OR "Cholangiocarcinomas" OR "Cholangiocellular Carcinoma" OR "Cholangiocellular Carcinomas" OR "Extrahepatic Cholangiocarcinoma" OR "Extrahepatic Cholangiocarcinomas" OR "Intrahepatic Cholangiocarcinoma" OR "Intrahepatic Cholangiocarcinomas" OR "Cholangiocarcinoma" OR "Cholangiocarcinomas" OR "Cholangiocellular Carcinoma" OR "Cholangiocellular Carcinomas" OR "Extrahepatic Cholangiocarcinoma" OR "Extrahepatic Cholangiocarcinomas" OR "Intrahepatic Cholangiocarcinoma" OR "Intrahepatic Cholangiocarcinomas" ) )

### **WEB OF SCIENCE**

((ALL=("Lymphocytes" OR "Lymphocyte" OR "Lymphoid Cells" OR "Cell, Lymphoid" OR "Cells, Lymphoid" OR "Lymphoid Cell" OR "Lymphocytes" OR "Lymphocyte" OR "Lymphoid Cells" OR "Lymphoid Cell" OR "Lymphocytes" OR "Lymphocyte" OR "Lymphoid Cells" OR "Lymphoid Cell")) AND ALL=("Monocyte" OR "Monocytes" OR "Monocyte" OR "Monocytes" OR "Monocyte" OR "Monocytes")) OR ALL=("Lymphocyte/Monocyte ratio" OR "Lymphocyte/Monocyte index" OR "Ratio Lymphocyte/Monocyte" OR "Index Lymphocyte/Monocyte" OR "Lymphocyte to Monocyte ratio" OR "Lymphocyte-to Monocyte ratio" OR "Lymphocyte to Monocyte index" OR "Lymphocyte-to Monocyte index" OR "Lymphocyte to Monocyte index" OR "Lymphocyte-to Monocyte index" OR "Ratio Lymphocyte to Monocyte" OR "Ratio Lymphocyte-to Monocyte" OR "Ratio Lymphocyte to Monocyte" OR "Index Lymphocyte to Monocyte" OR "Index Lymphocyte-to Monocyte" OR "Index Lymphocyte to Monocyte" OR "Index Lymphocyte-to Monocyte" OR "Lymphocyte-monocyte ratio" OR "Lymphocyte-monocyte index" OR "Ratio Lymphocyte-monocyte" OR "Index Lymphocyte-

monocyte" OR "LMR")) AND ALL=("Cholangiocarcinoma" OR "Cholangiocarcinomas" OR "Cholangiocellular Carcinoma" OR "Carcinoma, Cholangiocellular" OR "Carcinomas, Cholangiocellular" OR "Cholangiocellular Carcinomas" OR "Extrahepatic Cholangiocarcinoma" OR "Cholangiocarcinoma, Extrahepatic" OR "Cholangiocarcinomas, Extrahepatic" OR "Extrahepatic Cholangiocarcinomas" OR "Intrahepatic Cholangiocarcinoma" OR "Cholangiocarcinoma, Intrahepatic" OR "Cholangiocarcinomas, Intrahepatic" OR "Intrahepatic Cholangiocarcinomas" OR "Cholangiocarcinoma" OR "Cholangiocarcinomas" OR "Cholangiocellular Carcinoma" OR "Cholangiocellular Carcinomas" OR "Extrahepatic Cholangiocarcinoma" OR "Extrahepatic Cholangiocarcinomas" OR "Intrahepatic Cholangiocarcinoma" OR "Intrahepatic Cholangiocarcinomas" OR "Cholangiocarcinoma" OR "Cholangiocarcinomas" OR "Cholangiocellular Carcinoma" OR "Cholangiocellular Carcinomas" OR "Extrahepatic Cholangiocarcinoma" OR "Extrahepatic Cholangiocarcinomas" OR "Intrahepatic Cholangiocarcinoma" OR "Intrahepatic Cholangiocarcinomas")

### **COCHRANE LIBRARY**

("Lymphocytes" OR "Lymphocyte" OR "Lymphoid Cells" OR "Cell, Lymphoid" OR "Cells, Lymphoid" OR "Lymphoid Cell" OR "Lymphocytes" OR "Lymphocyte" OR "Lymphoid Cells" OR "Lymphoid Cell" OR "Lymphocytes" OR "Lymphocyte" OR "Lymphoid Cells" OR "Lymphoid Cell");ti,ab,kw AND ("Monocyte" OR "Monocytes" OR "Monocyte" OR "Monocytes");ti,ab,kw OR ("Lymphocyte to Monocyte ratio" OR "Lymphocyte-to Monocyte ratio" OR "Lymphocyte to-Monocyte ratio" OR "Lymphocyte-to-Monocyte ratio" OR "Lymphocyte to Monocyte index" OR "Lymphocyte-to Monocyte index" OR "Lymphocyte to-Monocyte index" OR "Lymphocyte-to-Monocyte index" OR "Ratio Lymphocyte to Monocyte" OR "Ratio

Lymphocyte-to Monocyte” OR “Ratio Lymphocyte to-Monocyte” OR “Ratio Lymphocyte-to-Monocyte” OR “Index Lymphocyte to Monocyte” OR “Index Lymphocyte-to Monocyte” OR “Index Lymphocyte to-Monocyte” OR “Index Lymphocyte-to-Monocyte” OR “Lymphocyte-monocyte ratio” OR “Lymphocyte-monocyte index” OR “Ratio Lymphocyte-monocyte” OR “Index Lymphocyte-monocyte” OR “LMR”) AND (“Cholangiocarcinoma” OR “Cholangiocarcinomas” OR “Cholangiocellular Carcinoma” OR “Carcinoma, Cholangiocellular” OR “Carcinomas, Cholangiocellular” OR “Cholangiocellular Carcinomas” OR “Extrahepatic Cholangiocarcinoma” OR “Cholangiocarcinoma, Extrahepatic” OR “Cholangiocarcinomas, Extrahepatic” OR “Extrahepatic Cholangiocarcinomas” OR “Intrahepatic Cholangiocarcinoma” OR “Cholangiocarcinoma, Intrahepatic” OR “Cholangiocarcinomas, Intrahepatic” OR “Intrahepatic Cholangiocarcinomas” OR “Cholangiocarcinoma” OR “Cholangiocarcinomas” OR “Cholangiocellular Carcinoma” OR “Cholangiocellular Carcinomas” OR “Extrahepatic Cholangiocarcinoma” OR “Extrahepatic Cholangiocarcinomas” OR “Intrahepatic Cholangiocarcinoma” OR “Intrahepatic Cholangiocarcinomas” OR “Cholangiocarcinoma” OR “Cholangiocarcinomas” OR “Cholangiocellular Carcinoma” OR “Cholangiocellular Carcinomas” OR “Extrahepatic Cholangiocarcinoma” OR “Extrahepatic Cholangiocarcinomas” OR “Intrahepatic Cholangiocarcinoma” OR “Intrahepatic Cholangiocarcinomas”):ti,ab,kw

### **OVID MEDLINE**

("Lymphocytes" OR "Lymphocyte" OR "Lymphoid Cells" OR "Cell, Lymphoid" OR "Cells, Lymphoid" OR "Lymphoid Cell" OR "Lymphocytes" OR "Lymphocyte" OR "Lymphoid Cells" OR "Lymphoid Cell" OR "Lymphocytes" OR "Lymphocyte" OR "Lymphoid Cells" OR "Lymphoid Cell").af. AND ("Monocyte" OR "Monocytes" OR "Monocyte" OR "Monocytes").af. OR ("Lymphocyte to Monocyte ratio" OR "Lymphocyte-to Monocyte ratio" OR "Lymphocyte to-Monocyte ratio" OR "Lymphocyte-to-Monocyte ratio" OR "Lymphocyte to Monocyte index" OR "Lymphocyte-to Monocyte index" OR "Lymphocyte to-Monocyte index" OR "Lymphocyte-to-Monocyte index" OR "Ratio Lymphocyte to Monocyte" OR "Ratio Lymphocyte-to Monocyte" OR "Ratio Lymphocyte to-Monocyte" OR "Ratio Lymphocyte-to-Monocyte" OR "Index Lymphocyte to Monocyte" OR "Index Lymphocyte-to Monocyte" OR "Index Lymphocyte to-Monocyte" OR "Index Lymphocyte-to-Monocyte" OR "Lymphocyte-monocyte ratio" OR "Lymphocyte-monocyte index" OR "Ratio Lymphocyte-monocyte" OR "Index Lymphocyte-monocyte" OR "LMR").af. AND ("Cholangiocarcinoma" OR "Cholangiocarcinomas" OR "Cholangiocellular Carcinoma" OR "Carcinoma, Cholangiocellular" OR "Carcinomas, Cholangiocellular" OR "Cholangiocellular Carcinomas" OR "Extrahepatic Cholangiocarcinoma" OR "Cholangiocarcinoma, Extrahepatic" OR "Cholangiocarcinomas, Extrahepatic" OR "Extrahepatic Cholangiocarcinomas" OR "Intrahepatic Cholangiocarcinoma" OR "Cholangiocarcinoma, Intrahepatic" OR "Cholangiocarcinomas, Intrahepatic" OR "Intrahepatic Cholangiocarcinomas" OR

“Cholangiocarcinoma” OR “Cholangiocarcinomas” OR “Cholangiocellular Carcinoma”  
OR “Cholangiocellular Carcinomas” OR “Extrahepatic Cholangiocarcinoma” OR  
“Extrahepatic Cholangiocarcinomas” OR “Intrahepatic Cholangiocarcinoma” OR  
“Intrahepatic Cholangiocarcinomas” OR “Cholangiocarcinoma” OR  
“Cholangiocarcinomas” OR “Cholangiocellular Carcinoma” OR “Cholangiocellular  
Carcinomas” OR “Extrahepatic Cholangiocarcinoma” OR “Extrahepatic  
Cholangiocarcinomas” OR “Intrahepatic Cholangiocarcinoma” OR “Intrahepatic  
Cholangiocarcinomas”).af.



**Table S1 : Outcome definitions for each study**

| <b>Author</b>                 | <b>Outcome</b> | <b>Definition</b>                                                                                                                                              |
|-------------------------------|----------------|----------------------------------------------------------------------------------------------------------------------------------------------------------------|
| <b>Wu Y et al. [18]</b>       | OS             | The time between radical surgery and mortality.                                                                                                                |
| <b>He C et al. [36]</b>       | OS             | The date of surgery to the date of death and tumor progression, respectively, or the last follow-up.                                                           |
| <b>Lin J et al. [20]</b>      | OS             | The interval between the date of resection and the date of death or the last follow-up.                                                                        |
| <b>Huh G et al. [22]</b>      | OS             | The time from chemotherapy initiation until death or the last follow-up.                                                                                       |
| <b>Ohira M et al. [23]</b>    | OS             | NR                                                                                                                                                             |
| <b>Yang H et.al [26]</b>      | OS             | The interval between the dates of partial hepatectomy and death or between the dates of partial hepatectomy and the last observation.                          |
| <b>Fu J et.al [33]</b>        | OS             | The interval between the date of LR to the date censored, the date of the patient's death, or last follow-up.                                                  |
| <b>Sui K et al. [24]</b>      | OS             | The surgery date until death is related to ICC.                                                                                                                |
| <b>Giampieri R et al.[30]</b> | OS             | NR                                                                                                                                                             |
| <b>Zhao J et al. [32]</b>     | OS             | NR                                                                                                                                                             |
| <b>Zhang C et al. [35]</b>    | OS             | The interval between the date of a definitive diagnosis and death or between the date of a definitive diagnosis and the last observation of surviving patients |
| <b>Bao W et al. [19]</b>      | OS             | The date of surgery to the date of patient's death or the last follow-up date                                                                                  |
|                               | RFS            | The date of surgery to the date of the first recurrence or last follow-up                                                                                      |
| <b>Zhang Z et al. [21]</b>    | OS             | The first day after hepatectomy to the ICC-related death.                                                                                                      |
|                               | RFS            | The first day after hepatectomy to the recurrence of ICC- or ICC-related death                                                                                 |
| <b>Yugawa K et al. [27]</b>   | OS             | The time from the date of surgery to the date of the last follow-up or death.                                                                                  |
|                               | RFS            | NR                                                                                                                                                             |
| <b>Ma B et. Al [25]</b>       | OS             | The date of first diagnosis of ICC to the date of death or last follow-up                                                                                      |

|                                |     |                                                                                                                                                                         |
|--------------------------------|-----|-------------------------------------------------------------------------------------------------------------------------------------------------------------------------|
|                                | DFS | The period between the date of surgery and the date of first recurrence or last follow-up                                                                               |
| <b>Hoshimoto S et al. [34]</b> | OS  | The time period from the date of surgery to either the date of death or the date of the last follow-up, whichever occurred first                                        |
|                                | DFS | The time period from the surgery date to the date of recurrence, last follow-up, or death, whichever occurred first.                                                    |
| <b>Deng L-M et al. [29]</b>    | OS  | The date of surgery to the date of patient death or last follow-up                                                                                                      |
|                                | RFS | The surgery date to the date of first ICC recurrence, death, or last follow-up visit.                                                                                   |
| <b>Lei Y et al. [28]</b>       | OS  | NR                                                                                                                                                                      |
|                                | TTR | NR                                                                                                                                                                      |
| <b>Zhang Y et. al [31]</b>     | OS  | The dates of operation to the dates of death or the dates of the last follow-up                                                                                         |
|                                | TTR | The interval between the dates of surgery and the first recurrence or from the dates of operation to the dates of last follow-up (for the patients without recurrence). |

NR : NOT REPORTED

Table S2. Newcastle - Ottawa quality assessment scale for included studies

| NEWCASTLE - OTTAWA QUALITY ASSESSMENT SCALE FOR COHORT STUDIES |                                          |                                     |                           |                                                                          |                                                                                 |                       |                                                 |                                  |       |                       |
|----------------------------------------------------------------|------------------------------------------|-------------------------------------|---------------------------|--------------------------------------------------------------------------|---------------------------------------------------------------------------------|-----------------------|-------------------------------------------------|----------------------------------|-------|-----------------------|
| STUDY                                                          | SELECTION                                |                                     |                           |                                                                          | COMPARABILITY                                                                   | OUTCOME               |                                                 |                                  |       |                       |
|                                                                | Representativeness of the exposed cohort | Selection of the non-exposed cohort | Ascertainment of exposure | Demonstration that outcome of interest was not present at start of study | Comparability of Cohorts on the Basis of the Design or Analysis<br>Maximum : ★★ | Assessment of outcome | Was follow-up long enough for outcomes to occur | Adequacy of follow up of cohorts | SCORE | Evidence quality      |
| Wu Y et al. [18]                                               | ★                                        | ★                                   | ★                         | ★                                                                        | ★                                                                               | ★                     | ★                                               | ★                                | 8     | Low Risk of bias      |
| He C et al. [36]                                               |                                          | ★                                   | ★                         | ★                                                                        | ★                                                                               | ★                     | ★                                               | ★                                | 7     | Low Risk of bias      |
| Lin J et al. [20]                                              | ★                                        |                                     | ★                         | ★                                                                        | ★                                                                               | ★                     |                                                 | ★                                | 6     | Moderate risk of bias |
| Huh G et al. [22]                                              |                                          | ★                                   | ★                         | ★                                                                        | ★                                                                               | ★                     | ★                                               |                                  | 6     | Moderate risk of bias |
| Ohira M et al. [23]                                            | ★                                        |                                     | ★                         | ★                                                                        | ★                                                                               |                       |                                                 | ★                                | 5     | Moderate risk of bias |
| Yang H et.al [26]                                              | ★                                        | ★                                   | ★                         | ★                                                                        | ★★                                                                              | ★                     | ★                                               | ★                                | 9     | Low Risk of bias      |
| Sui K et al. [24]                                              | ★                                        |                                     |                           | ★                                                                        |                                                                                 | ★                     | ★                                               |                                  | 4     | Moderate risk of bias |
| Giampieri R et al.[30]                                         | ★                                        | ★                                   | ★                         | ★                                                                        | ★                                                                               | ★                     | ★                                               | ★                                | 8     | Low Risk of bias      |
| Zhao J et al. [32]                                             | ★                                        | ★                                   | ★                         | ★                                                                        |                                                                                 |                       | ★                                               |                                  | 5     | Moderate risk of bias |
| Zhang C et al. [35]                                            | ★                                        | ★                                   | ★                         |                                                                          | ★                                                                               | ★                     | ★                                               | ★                                | 7     | Low Risk of bias      |
| Bao W et al. [19]                                              | ★                                        | ★                                   | ★                         | ★                                                                        | ★                                                                               |                       | ★                                               | ★                                | 7     | Low Risk of bias      |

|                                       |   |   |   |   |    |   |   |   |   |                       |
|---------------------------------------|---|---|---|---|----|---|---|---|---|-----------------------|
| <i>Zhang Z et al. [21]</i>            | ☆ | ☆ | ☆ |   |    | ☆ | ☆ | ☆ | 6 | Moderate risk of bias |
| <i>Yugawa K et al. [27]</i>           | ☆ | ☆ |   | ☆ |    | ☆ | ☆ |   | 5 | Moderate risk of bias |
| <i>Ma B (COHORT A) et. Al [25]</i>    | ☆ | ☆ | ☆ | ☆ | ☆  | ☆ |   | ☆ | 7 | Low Risk of bias      |
| <i>Ma B (COHORT B) et. Al [25]</i>    | ☆ | ☆ | ☆ | ☆ | ☆  | ☆ |   | ☆ | 7 | Low Risk of bias      |
| <i>Fu J et.al [33]</i>                | ☆ |   | ☆ | ☆ | ☆  |   |   | ☆ | 5 | Moderate risk of bias |
| <i>Hoshimoto S et al. [34]</i>        | ☆ | ☆ | ☆ | ☆ | ☆☆ | ☆ | ☆ | ☆ | 9 | Low Risk of bias      |
| <i>Deng L-M et al. [29]</i>           | ☆ | ☆ | ☆ | ☆ | ☆  | ☆ | ☆ | ☆ | 8 | Low Risk of bias      |
| <i>Lei Y et al. [28]</i>              | ☆ | ☆ | ☆ |   | ☆  | ☆ | ☆ | ☆ | 7 | Low Risk of bias      |
| <i>Zhang Y (COHORT A) et .al [31]</i> | ☆ | ☆ | ☆ |   | ☆☆ | ☆ | ☆ | ☆ | 8 | Low Risk of bias      |
| <i>Zhang Y (COHORT B) et .al [31]</i> | ☆ | ☆ | ☆ |   | ☆☆ | ☆ | ☆ | ☆ | 8 | Low Risk of bias      |

**Figure S1. Subgroup analysis according to the cut-off values ( $\geq 3.5$  vs  $< 3.5$ ) of the association between LMR and OS in patients with cholangiocarcinoma**

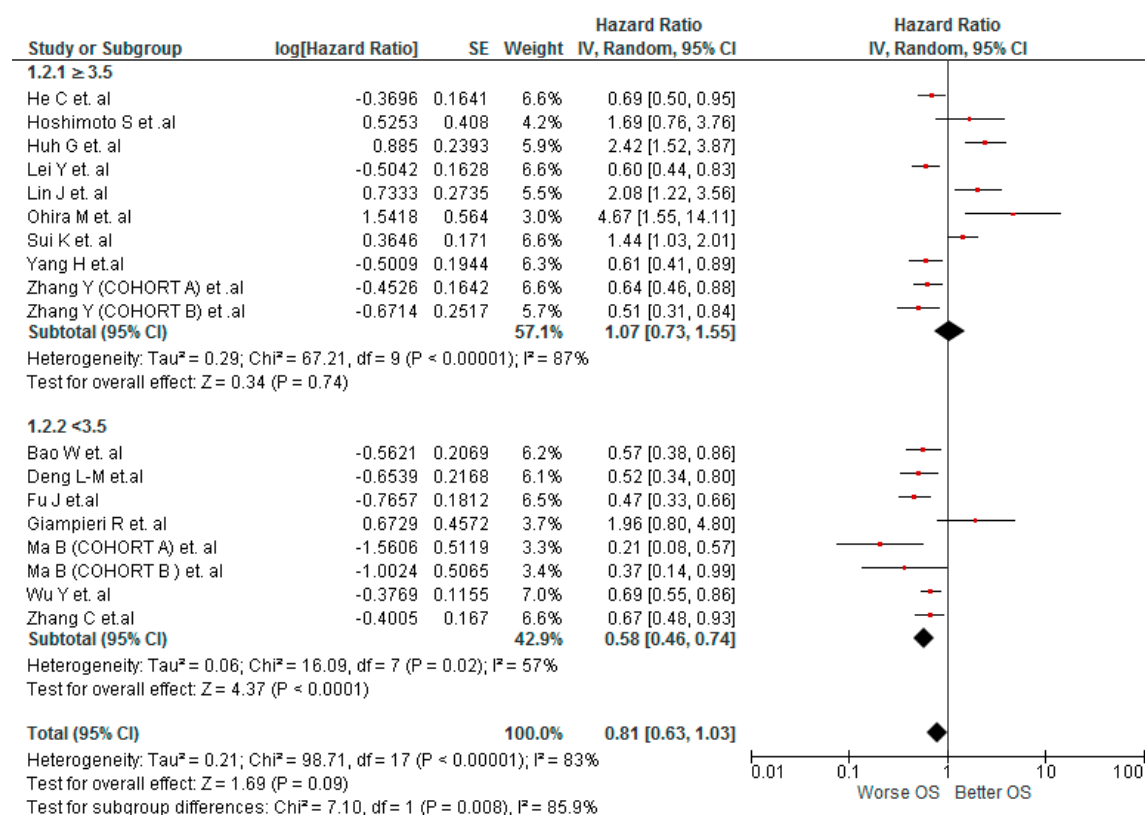

**Figure S2. Subgroup analysis according to the treatment of the association between LMR and OS in patients with cholangiocarcinoma**

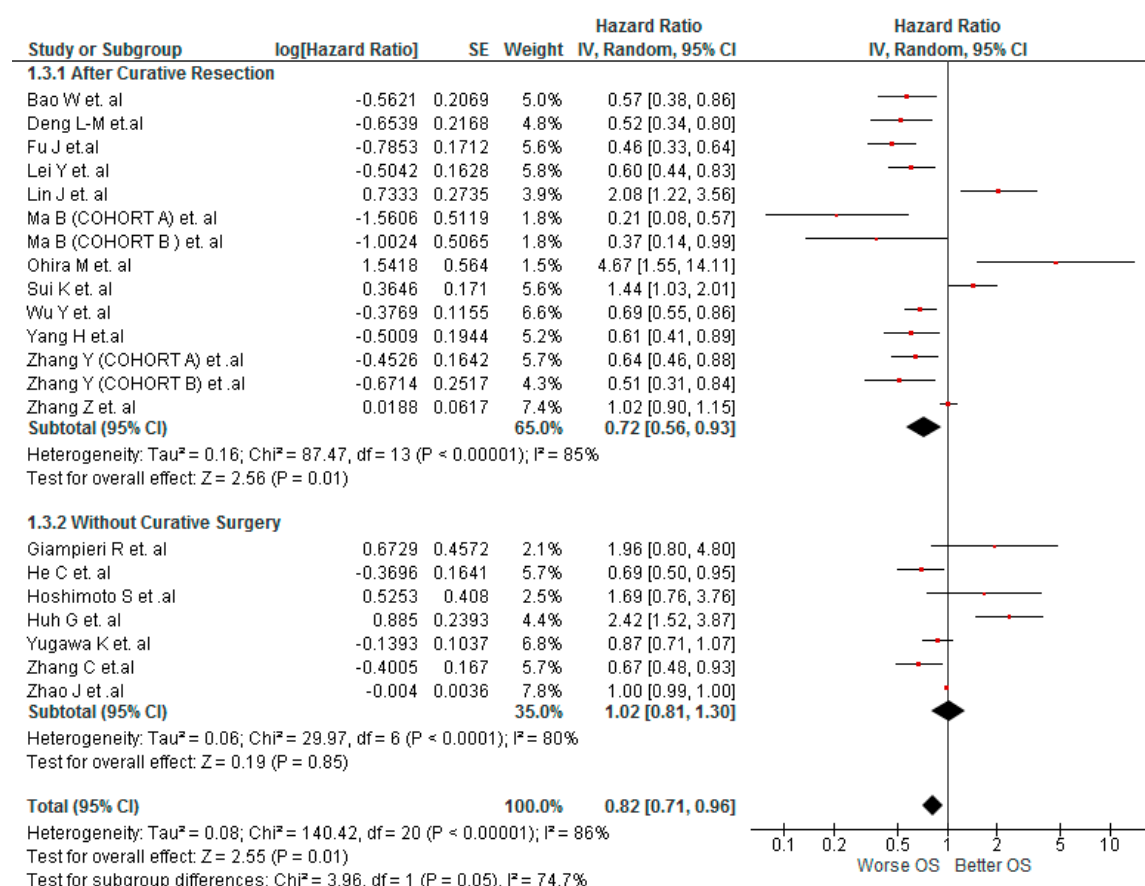

**Figure S3. Subgroup analysis according to the origin country of the association between LMR and OS in patients with cholangiocarcinoma**

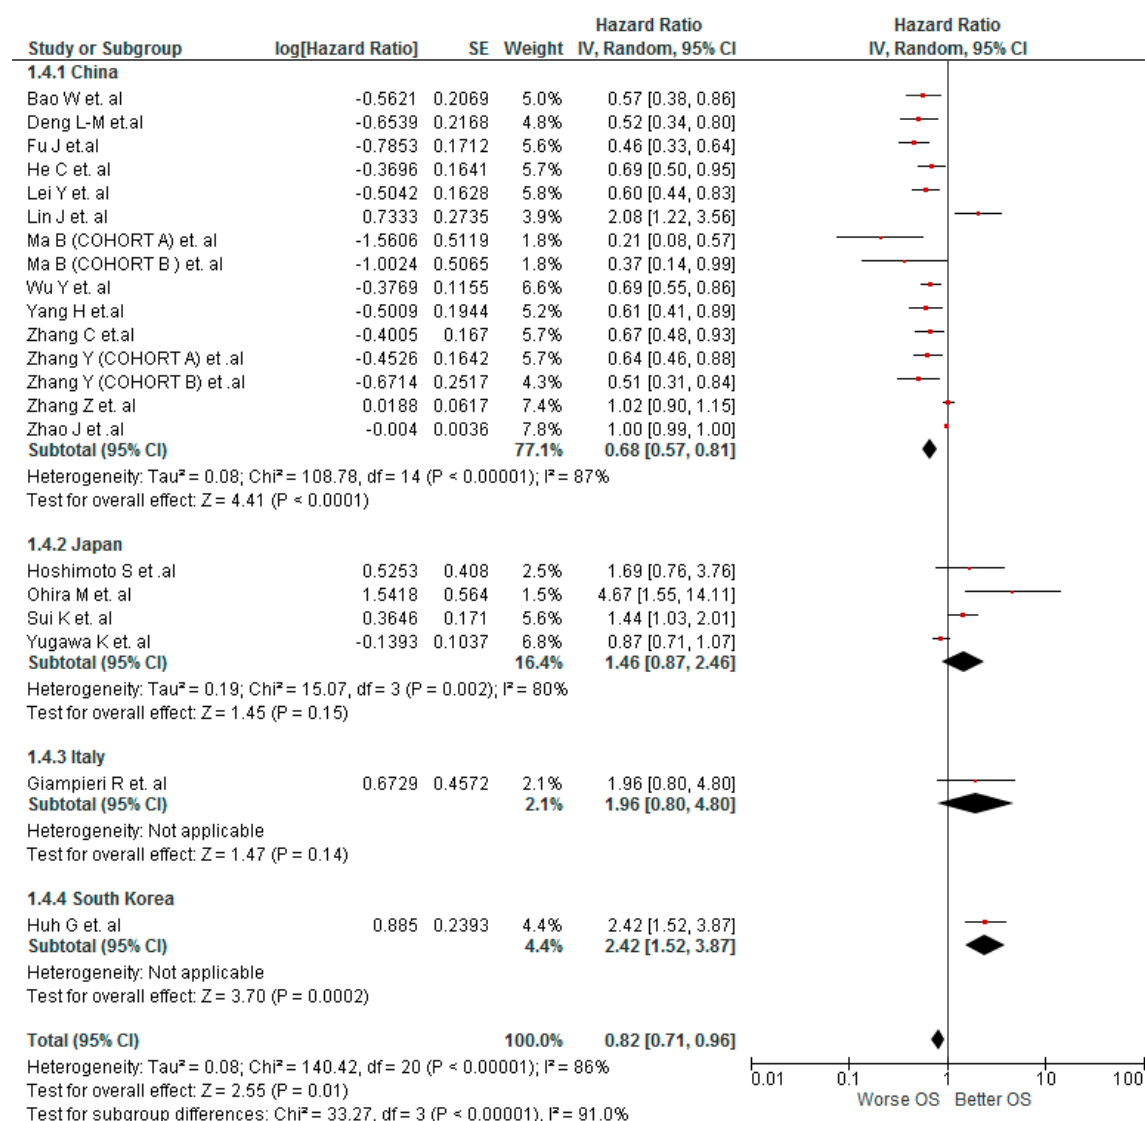

**Figure S4. Sensitivity analysis according to risk of bias of the association between LMR and OS in patients with cholangiocarcinoma**

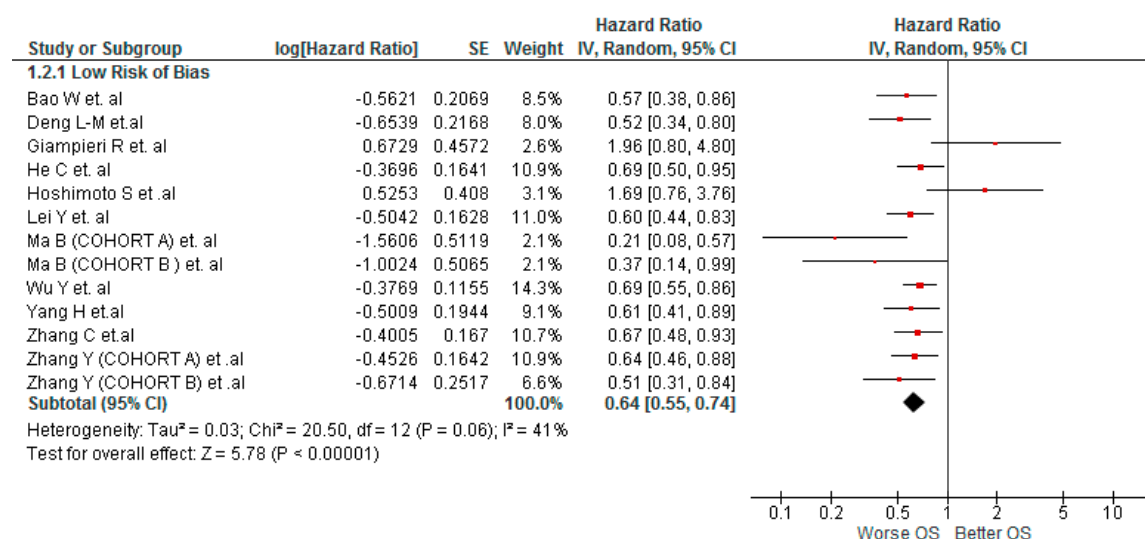

**Figure S5. Funnel Plot of the studies that evaluated the association between LMR values and OS**

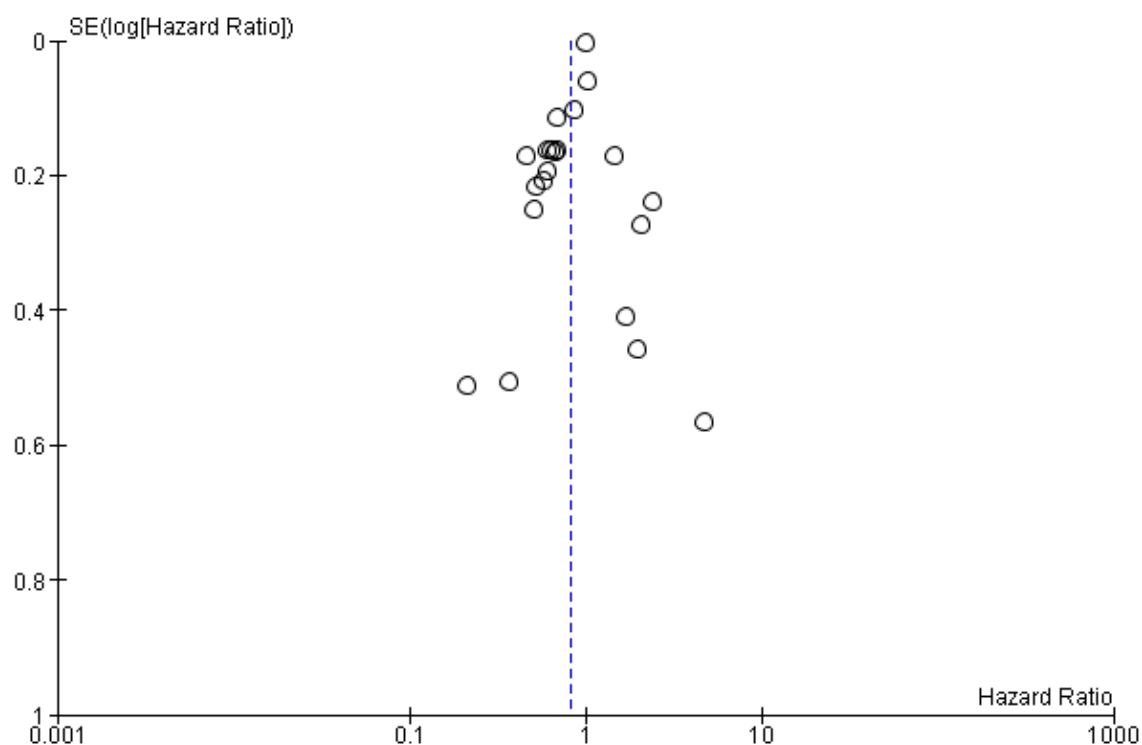

Supplement: s1 [file s1]
